# Supplementary material for: Electrical power and hydrogen production from a photo-fuel cell using formic acid and other single-carbon organics
Source: Royal Society of Chemistry journal article supplement (doi:10.1039/c2jm16635f), 2012-01-01
Supplement: c2jm16635f.pdf [file c2jm16635f.pdf]

# Electrical Power and Hydrogen Production from a Photo-Fuel Cell Using Formic Acid and Other Single Carbon Organics

Brian Seger, Gao Qing (Max) Lu and Lianzhou Wang\*

ARC Centre of Excellence for Functional Nanomaterials, School of Chemical Engineering and Australian Institute for Bioengineering and Nanotechnology, The University of Queensland, St Lucia, Brisbane, QLD 4072 Australia,

Fax: + 61 7 334 63973 Tel: 61 7-336-54218; e-mail: l.wang@uq.edu.au

## Photocurrent Optimizations on Carbon Paper

A 5mg/mL TiO<sub>2</sub> solution in methanol was prepared and stirred for at least 30 minutes before using. Carbon paper electrodes were cut into 5cm by 1cm strips for optimization testing of loading amount and annealing temperature. The TiO<sub>2</sub> was then deposited on 2cm<sup>2</sup> of the electrodes via a drop-cast method as well as a spray method. Varying amount of TiO<sub>2</sub> from 0.5mg/cm<sup>2</sup> to 5mg/cm<sup>2</sup> was deposited on an electrode. The electrodes were then heated to 400°C. Once the electrodes were prepared, they were then put in a 1M methanol solution with 0.1M sulfuric acid as an electrolyte. Nitrogen gas was bubbled for 15 minutes to purge oxygen from the system. Photocurrent measurements were taken to determine the optimum TiO<sub>2</sub> loading and optimum method of deposition (drop-cast vs. spraying). The results are shown below in Figure S1.

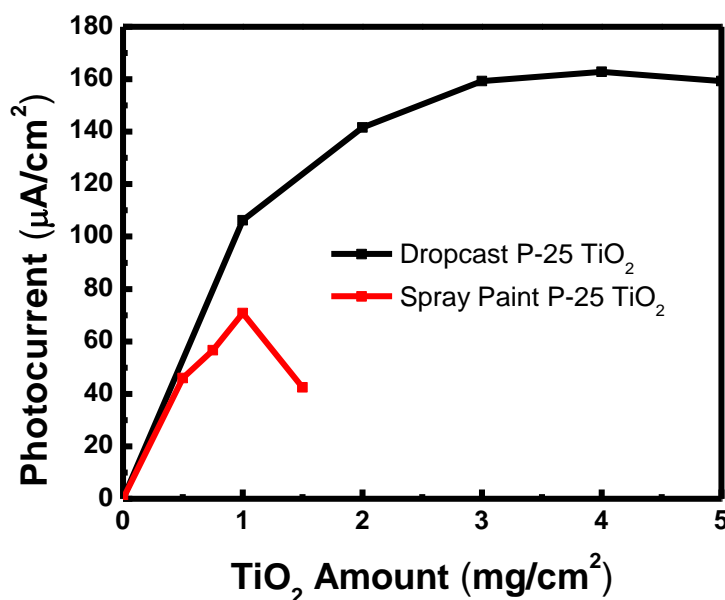

Figure S1: Optimization of concentration and deposition method of TiO<sub>2</sub> on carbon paper

## Photo-efficiency Estimations

We determined the photo-efficiency via the following equation:

$$\% \text{ efficiency} = 100\% * \frac{P_{out}}{P_{in}}$$

Where  $P_{out}$  is the amount of photons used for hydrogen production and  $P_{in}$  is the amount of photons with an energy high enough to photo-excite the  $\text{TiO}_2$  semiconductor. To determine  $P_{out}$ , the amount of hydrogen gas was converted to moles electrons using the ideal gas law. The calculations are shown below.

$$n = \frac{PV}{RT}$$

$$n(e^-) = \frac{\frac{60\mu\text{L } H_2}{\text{hr} * \text{cm}^2} \times 1\text{atm}}{82,057 \frac{\mu\text{L } H_2 * \text{atm}}{\text{mol } H_2 * \text{K}} \times 298\text{K}} \times \frac{2 \text{ mol } e^-}{1 \text{ mol } H_2} = 4.9 \times 10^{-6} \frac{\text{mol } e^-}{\text{cm}^2 \times \text{hr}}$$

The catalyst used was P-25  $\text{TiO}_2$ , which consists of 70% anatase  $\text{TiO}_2$  and 30% rutile. Since rutile has a lower bandgap, it will be conservatively assumed that  $\text{TiO}_2$  can potentially absorb all photons with an energy equal to or higher than the rutile bandgap. In terms of wavelengths, this corresponds to any photon with a wavelength greater than 413nm. Using an AM1.5 solar simulator we can approximate the solar flux to match that of the sun (e.g. ASTM G173-03 Reference Spectra). By integrating the solar flux from 0 to 413nm the number of incoming photons ( $P_{in}$ ) can be determined.

$$P_{in} = \int_0^{413} \text{ of ASTM G17303 Reference Spectra} = 7.07 \times 10^{-5} \frac{\text{mol photons}}{\text{cm}^2 \times \text{hr}} = 7.07 \times 10^{-5} \frac{\text{mol } e^-}{\text{cm}^2 \times \text{hr}}$$

Thus by dividing the electrons used to produce hydrogen by the total electron-hole pairs produced, a photon to electron efficiency can be found as followed:

$$\% \text{ efficiency} = 100\% * \frac{4.9 \times 10^{-6} \frac{\text{mol } e^-}{\text{cm}^2 \times \text{hr}}}{7.07 \times 10^{-5} \frac{e^-}{\text{cm}^2 \times \text{hr}}} = 7\%$$

However if it is assumed that current doubling occurs for the formic acid oxidation (1 electron-hole pair produces 2 electrons), the efficiency of the cell would then be 3.5%.
